# Supplementary material for: Comparing model and measured ice crystal concentrations in orographic clouds during the INUPIAQ campaign
Source: Copernicus journal article supplement (doi:10.5194/acp-16-4945-2016), 2016-04-21
Supplement: Supplementary file 1 [file acp-16-4945-2016-supplement.pdf]

Supplement of Atmos. Chem. Phys., 16, 4945–4966, 2016  
<http://www.atmos-chem-phys.net/16/4945/2016/>  
doi:10.5194/acp-16-4945-2016-supplement  
© Author(s) 2016. CC Attribution 3.0 License.

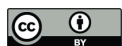

Atmospheric  
Chemistry  
and Physics  
Open Access  
EGU

*Supplement of*

## **Comparing model and measured ice crystal concentrations in orographic clouds during the INUPIAQ campaign**

**Robert J. Farrington et al.**

*Correspondence to:* Robert J. Farrington (robert.farrington@manchester.ac.uk)  
and Paul J. Connolly (p.connolly@manchester.ac.uk)

The copyright of individual parts of the supplement might differ from the CC-BY 3.0 licence.

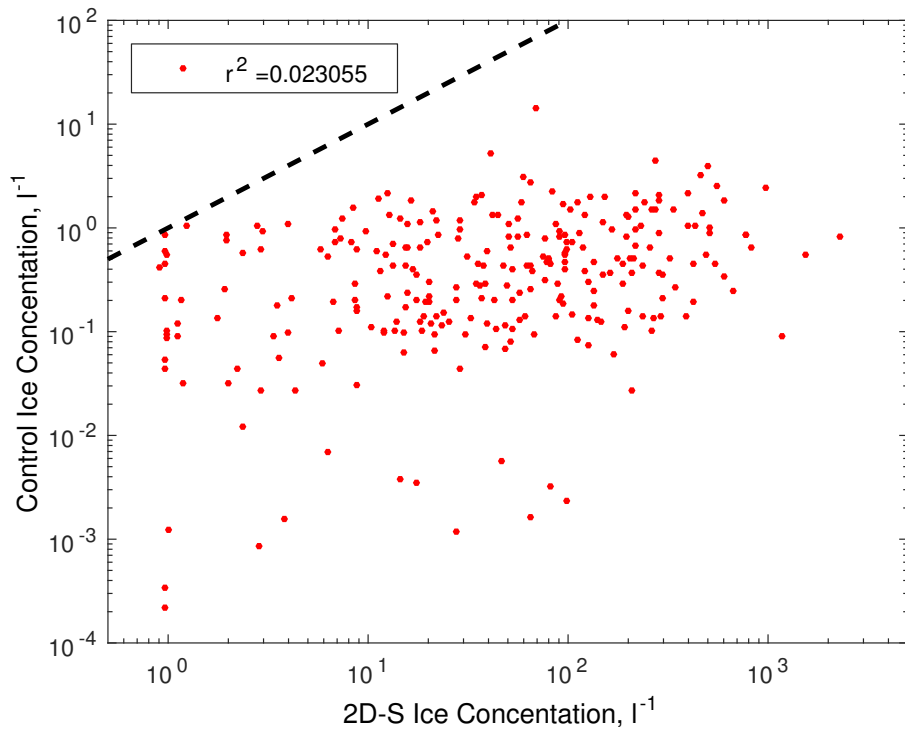

Figure S1: A Comparison between the ice concentration observed by the 2D-S at Jungfraujoch and the ice concentration simulated at Jungfraujoch by the Control simulation. In addition to the  $r^2$  correlation coefficient, parity is indicated by the black dashed line..

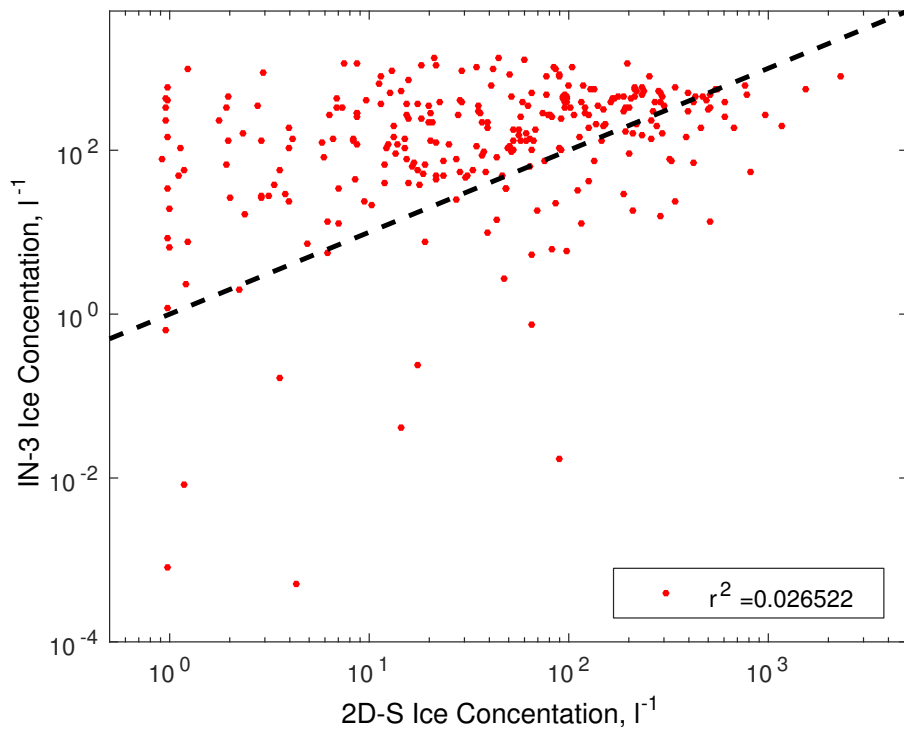

Figure 2: A Comparison between the ice concentration observed by the 2D-S at Jungfraujoch and the ice concentration simulated at Jungfraujoch by the IN-3 simulation. In addition to the  $r^2$  correlation coefficient, parity is indicated by the black dashed line.

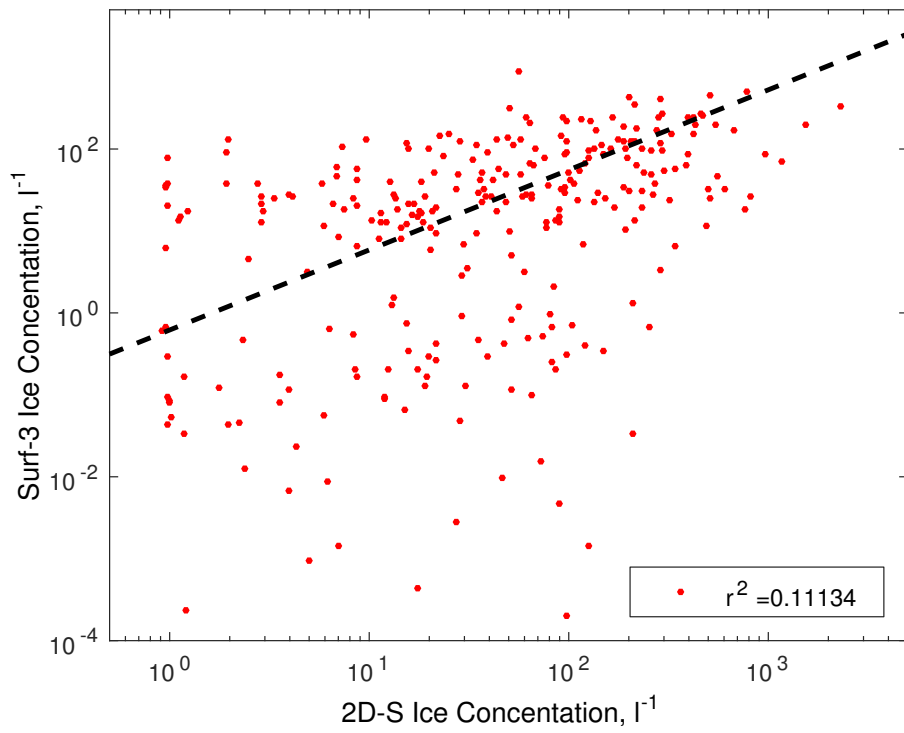

Figure 3: A Comparison between the ice concentration observed by the 2D-S at Jungfraujoch and the ice concentration simulated at Jungfraujoch by the Surf-3 simulation. In addition to the  $r^2$  correlation coefficient, parity is indicated by the black dashed line.
